# Supplementary material
Source: PubMed Central journal article supplement (PMC9684350)
Supplement: NIHMS1796820-supplement-supinfo.pdf [file NIHMS1796820-supplement-supinfo.pdf]

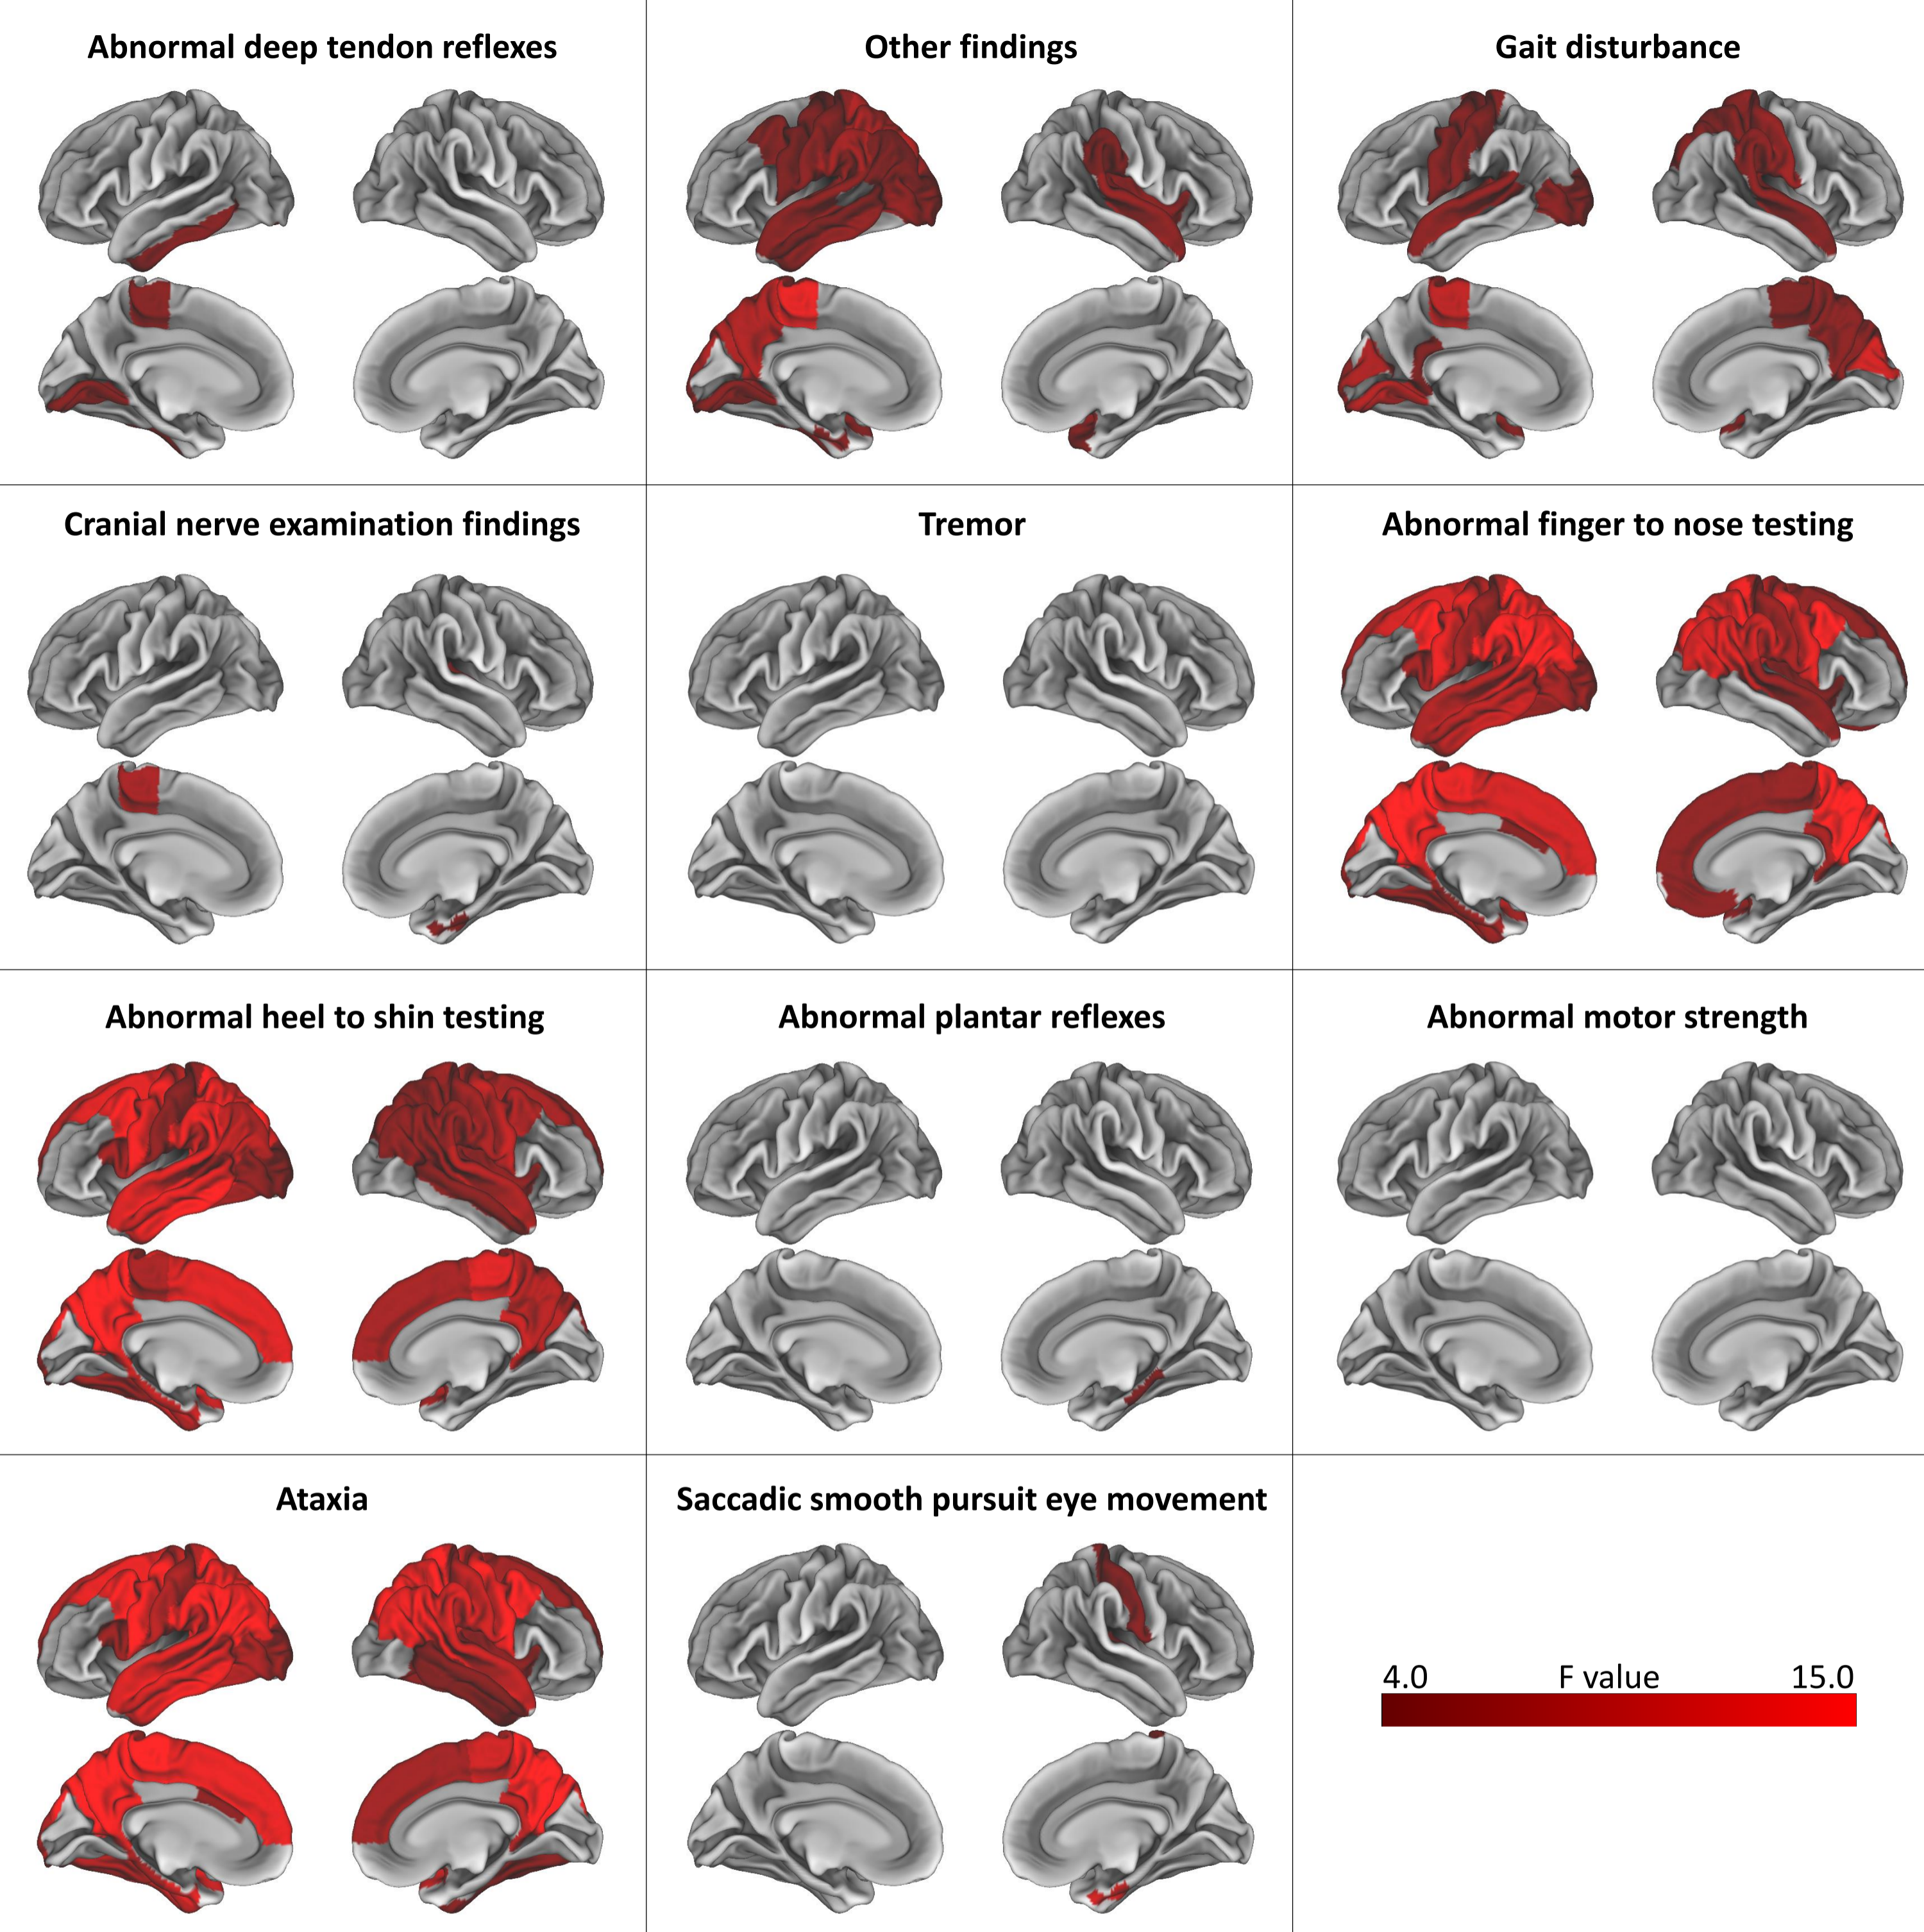

Supplementary figure: Associations between the single Alzheimer disease neurological examinations findings, ataxia and saccadic smooth pursuit eye movement and brain atrophy. Most of the single AD-NEF, ataxia and saccadic smooth pursuit eye movement were associated with a fronto-temporo-parietal pattern of atrophy in an exploratory analysis with an alpha threshold of 0.05. After adjusting for 82 regions of interest using the Bonferroni method (resulting alpha threshold  $<0.0006$ ), no brain region remained significantly different. There were no significant associations between any AD-NEF, ataxia or saccadic smooth pursuit eye movement and atrophy in any subcortical region.
